1                   **Limited reciprocal surrogacy of bird and habitat diversity and**  
2                   **inconsistencies in their representation in Romanian protected areas**

3

4 Julia C. Geue<sup>1,#a\*</sup>, Paula J. Rotter<sup>1</sup>, Caspar Gross<sup>2</sup>, Zoltán Benkő<sup>3</sup>, István Kovács<sup>4</sup>, Ciprian Fântână<sup>3</sup>,  
5 Judit Veres-Szászka<sup>3</sup>, Cristi Domșa<sup>3</sup>, Emanuel Baltag<sup>4,7</sup>, Szilárd J. Daróczi<sup>4</sup>, Gábor M. Bóné<sup>4</sup>, Viorel  
6 D. Popescu<sup>5,6</sup>, Henri A. Thomassen<sup>1</sup>

7

8 <sup>1</sup> Comparative Zoology, Institute for Evolution and Ecology, University of Tübingen, Tübingen,  
9 Germany

10 <sup>2</sup> Institute of Medical Genetics and Applied Genomics, University of Tübingen, Tübingen, Germany

11 <sup>3</sup> Romanian Ornithological Society / BirdLife Romania, Cluj-Napoca, Romania

12 <sup>4</sup> Milvus Group, Bird and Nature Protection Association, Târgu Mureș, Romania

13 <sup>5</sup> Department of Biological Sciences and Sustainability Studies Theme, Ohio University, Athens, Ohio,  
14 USA

15 <sup>6</sup> Centre for Environmental Research, University of Bucharest, Bucharest, Romania

16 <sup>7</sup> Marine Biological Station "Prof. Dr. Ioan Borcea", Agigea, "Alexandru Ioan Cuza" University of  
17 Iași, Iași, Romania

18 <sup>#a</sup> Current Address: Department of Ecology and Environmental Sciences, Umeå University, Umeå,  
19 Sweden

20

21 \* Corresponding Author:

22 E-mail: [Julia.geue@uni-tuebingen.de](mailto:Julia.geue@uni-tuebingen.de) (JG)

## 23 **Abstract**

24 Because it is impossible to comprehensively characterize biodiversity at all levels of organization,  
25 conservation prioritization efforts need to rely on surrogates. As species distribution maps of relict  
26 groups as well as high-resolution remotely sensed data increasingly become available, both types of  
27 surrogates are commonly used. A good surrogate should represent as much of biodiversity as possible,  
28 but it often remains unclear to what extent this is the case. Here, we aimed to address this question by  
29 assessing how well bird species and habitat diversity represent one another. We conducted our study in  
30 Romania, a species-rich country with high landscape heterogeneity where bird species distribution  
31 data have only recently started to become available. First, we prioritized areas for conservation based  
32 on either 137 breeding bird species or 36 habitat classes, and then evaluated their reciprocal surrogacy  
33 performance. Second, we examined how well these features are represented in already existing  
34 protected areas. Finally, we identified target regions of high conservation value for the potential  
35 expansion of the current network of reserves (as planned under the new EU Biodiversity Strategy for  
36 2030). We found that bird species were a better surrogate for habitat diversity than vice versa. Highly  
37 ranked areas based on habitat diversity were represented better than areas based on bird species, which  
38 varied considerably between species. Our results highlight that taxonomic and environmental (i.e.,  
39 habitat types) data may perform rather poorly as reciprocal surrogates, and multiple sources of data are  
40 required for a full evaluation of protected areas expansion.

41

42

## 43 **Introduction**

44

45 The ultimate goal of conservation prioritization is the protection of biodiversity at all levels of  
46 organization [1]. However, limited financial resources and competing stakeholder interests constrain  
47 the area that can reasonably be protected. The process of identifying potential regions for designation  
48 as protected area (PA) should therefore be undertaken thoroughly and strategically [2, 3, see 4 for a  
49 review]. The striking obstacle is however that biodiversity is very complex and difficult to characterize  
50 [5], and surveying biodiversity in its entirety is nearly impossible. Shortcuts necessarily need to be  
51 taken to quicken the prioritization process and ensure its feasibility [6]. One of these shortcuts is using  
52 a biodiversity or environmental indicator as a conservation surrogate [see 4 for a review, 7], which is:  
53 “An ecological process or element (e.g., species, ecosystem, or abiotic factor) that [should] [...]”  
54 represent (i.e., serve as a proxy for) another aspect of an ecological system” [8]. The efficacy and  
55 efficiency of surrogates for overall biodiversity (known and unknown) have progressively been  
56 evaluated [7, 9-13], and appear to be influenced by factors such as the size of the study area, type of  
57 surrogate, and the spatial resolution of surrogate data [e.g. 13, 14, 15]. Nevertheless, it often remains  
58 ambiguous to what extent a surrogate represents other levels of biodiversity, in particular across  
59 different levels of organization.

60

61 Biodiversity surrogates are usually subdivided into taxonomic and environmental surrogates [7, 10,  
62 15]. Many studies have evaluated the efficacy of taxonomic surrogates for other taxonomic groups  
63 [e.g. see 6, 16 for a review, 17-21]. The general consensus is that one taxonomic group alone might  
64 not be an adequate surrogate for others [13, 14, 22, see 23 for a review, 24, 25], and the identification  
65 of PAs should include more than one species or taxonomic group [14, 26]. Yet again, for many areas  
66 in the world accurate species distribution data is scarce. One of the taxonomic groups for which rich  
67 datasets are available are birds, because they are of interest to many people and are therefore one of  
68 the best surveyed taxa in the world [26-28]. As such, birds are frequently used as biodiversity  
69 indicators and conservation surrogates, and their surrogacy effectiveness varies from representing

70 overall species diversity well (other taxa than birds) [9, 23, 26, 29], or threatened birds being adequate  
71 surrogates for non-threatened bird species [14], to being poor surrogates for other taxa [20, 30, 31].  
72 Adding more taxa [26] or even different biodiversity features, such as environmental diversity [13,  
73 32], increased the overall surrogacy of birds for other levels of biodiversity.

74

75 Environmental diversity (ED), in particular habitat diversity, has the potential to be a powerful  
76 surrogate and represent other levels of biological organization, because habitat data can be generated  
77 quickly and relatively inexpensively from remotely sensed or extrapolated ground data [7, 15, 23, 33-  
78 36]. By using ED in conservation prioritization, it is assumed that selected areas do not only cover a  
79 wide range of different environmental conditions, but also areas, rich in other biodiversity features,  
80 such as species [35]. Furthermore, environmental surrogates may capture interactions between species  
81 and their environment [32], and compensate for a potential lack of congruence between taxonomic  
82 surrogates [22]. However, compared to taxonomic surrogates, the application of environmental  
83 surrogates received less attention. One potential reason may be that so far no clear and explicit  
84 recommendation about the efficiency of ED as a surrogate for biodiversity in general exists [e.g. 37,  
85 38]. Moreover, there is no consensus on the way that ED is measured and included in a surrogacy  
86 approach, e.g. continuous versus discrete measures of ED [e.g. 37]. Some studies suggested that  
87 continuously distributed environmental variables (e.g. climate variables such as temperature and  
88 precipitation, or vegetation characteristics such as percent tree cover) may outperform discrete  
89 (classified) environmental data [e.g. 39, 40], but also may be inadequate [13, 23, 38] or at most better  
90 than random surrogates for species occurrence [7, 36]. Other studies, however, found that categorical  
91 environmental data in the form of pre-classified information (e.g. land classes, ecological vegetation  
92 classes or habitat types), may nevertheless be better surrogates than continuous environmental data  
93 [e.g. 15, 32, 37, 38]. The representation of habitat or land cover categories for other levels of  
94 biodiversity may vary considerably, for instance being weak for plant species [32, 41], but better for  
95 plants than for vertebrates [10, 13, 15, 42, 43]. Yet, such contrasting results could also result from  
96 differences in the spatial extent and resolution of the study area, as well as the type of environmental

97 data used and the amount of different environmental features included as a surrogate (vegetation or  
98 climate-based) [4, 15, 36, 44, 45].

99

100 Given uncertainties surrounding the potential for categorical habitat data to serve as a surrogate for  
101 biodiversity, the goal of our study was to evaluate its representation of one of the most frequently used  
102 biodiversity surrogates, bird species distributions, and vice versa. We implemented this analysis for  
103 Romania, a country within the European Union exhibiting high bird species and habitat diversity,  
104 likely caused by the variety of biogeographic regions it comprises [46, 47]. While 23% of Romania is  
105 protected, either under the pan-European Natura 2000 network or as natural or national parks or  
106 biosphere reserves [48], and despite its high levels of biodiversity, efforts to identify conservation  
107 priorities and evaluate the efficacy of the network of reserves to protect biodiversity have been sparse  
108 [mentioned by 11 but not examined, 21, 48-51]. One reason for this disparity is that species  
109 distribution data have only recently become widely available. As such, PA management could greatly  
110 benefit from prioritization efforts using systematic conservation planning principles and the latest  
111 available data, particularly when establishing new PAs [48, 49]. The implementation of such scientific  
112 research in the establishment and governance process of PAs is, however, often limited [52, 53]. This  
113 is not a unique situation, as for instance Natura 2000 sites consist of a diverse array of reserves  
114 designed for particular species, but not to protect biodiversity as a whole, so they often represent  
115 species and habitat diversity only to a limited extent [38, 49, 54, 55]. Furthermore, the European  
116 Commission decided to set new targets for 2030 and increase the percentage of protected areas in EU  
117 member states to 30% [56]. Hence, there is a need to identify additional areas for protection, which is  
118 best done using the principles of systematic conservation planning [57].

119

120

121 In this study, we first evaluated whether breeding bird species and habitat diversity based on remote-  
122 sensing data are adequate surrogates for one another. We assessed surrogacy of the two datasets using  
123 high-resolution data (1km) of (a) 137 modelled breeding bird species distributions and (b) 36 classes  
124 of mapped habitat types from the “Ecosystem Types of Europe” (ETE) data set [58]. Second, we

125 evaluated whether existing protected areas (national and natural parks, biosphere reserves, wetland  
126 reserves and SPAs (as part of the Natura 2000 network)) in Romania are effective in representing  
127 areas of conservation concern for both birds and habitats. Finally, we identified additional areas that  
128 could be prioritized in an effort to expand the current PA network to more comprehensively protect  
129 bird and habitat diversity.

130

131

## 132 **Methods**

133

### 134 **Study region**

135 Romania is located in Eastern Europe, at the western shores of the Black Sea. It covers 238 397 km<sup>2</sup>  
136 and natural landmarks and borders are dominated by the Carpathian Mountains and the Danube River.  
137 Five biogeographical regions have been characterized across Romania: Pannonian, Continental,  
138 Alpine, Steppic, and Black Sea. The heterogeneous landscape consists of an alternation between  
139 intensive and extensive agricultural areas and (semi-) natural areas, such as forest, open woodland, and  
140 grassland. As a member of the European Union, Romania is bound to the directives of the Natura 2000  
141 network, and dedicated about 23% of its total landscape to conservation. The Natura 2000 network is  
142 an important biodiversity conservation measure [11], and consists of different types of protected areas:  
143 the terrestrial Special Protection Areas (SPA, for bird protection only), the terrestrial Sites of  
144 Community Importance, and Special Areas of Conservation (SCI and SAC, for habitats and/or  
145 species) [59]). In addition to, but partly overlapping with the Natura 2000 network, Romania also  
146 implemented protected areas designated as natural and national parks as well as biosphere reserves  
147 [48].

148

### 149 **Biodiversity features**

150

## 151 **Bird species distributions**

152 Bird species occurrence data (from the years 2006-2018) were obtained from the forthcoming Romanian  
153 Breeding Bird Atlas ([60], in preparation), a scheme run by Milvus Group Association and the Romanian  
154 Ornithological Society. Because data based on species atlases often entail a geographic sampling bias  
155 [61], we first modelled the distributions of 137 breeding bird species using MaxEnt 3.4.1. [62] at two  
156 different resolutions (1x1km and 2x2km), depending on the species' ecology or in some cases by the  
157 available data (S1 Table). In-depth details on the species distribution modeling approach are provided  
158 in S1 Supporting information.

159

160

## 161 **Habitat types**

162 We used the published maps of habitat types classified in the “Ecosystem Types of Europe” (ETE)  
163 data set (version 3.1)[58]. ETE is a combination of the non-spatially referenced EUNIS (European  
164 Nature Information System) habitat classification scheme and a spatially explicit habitat data set, the  
165 Corine-based “Mapping and Assessment of Ecosystem and their services (MAES)” ecosystem classes  
166 [63]. In Romania, 42 ETE habitat classes are mapped (level 2 classification) at 100 m resolution (S2  
167 Table). Habitat classes including highly built-up areas (six classes) were excluded in the subsequent  
168 spatial conservation mapping. These built-up areas were selected according to the ETE classification  
169 category "J" (J1-J6, see S2 Table), which include buildings in cities and villages, industrial sites,  
170 transport networks, artificial water structures and waste deposits.

171 To produce maps of habitat types that match the spatial resolution of those for the bird species, we  
172 split the pre-defined ETE data set into single data layers per class (36 in total) and calculated the  
173 proportion of each habitat type within 1 km<sup>2</sup> grid cells.

174

## 175 **Data handling**

176 All spatial data layers were re-projected to the Dealul Piscului 1970/ Stereo 70 projection and  
177 processed at a 1 km resolution containing a total number of 381 248 grid cells. Species distribution

178 models at 2 km resolution were resampled to 1 km grid cell size. Preparation of input maps and post-  
179 processing of results was done in R (version 3.6.1), using the packages (zonator, raster, rgdal, rgeos,  
180 sp, maptools, tiff, data.table, plyr, dplyr, ggplot2, zoo). Maps were visualized in QGIS (version 3.10.6  
181 'A Coruña').

182

## 183 **Spatial conservation prioritization**

184 We prioritized areas for conservation using the software Zonation 4.0 [64]. Zonation can handle large  
185 data sets [65] and provides a priority ranking over the entire landscape rather than satisfying a specific  
186 target. The ranking is produced by iteratively discarding locations (grid cells) with the lowest  
187 conservation values, retaining the ones with the highest conservation value throughout the process [66,  
188 67].

189

190 We used the additive-benefit function (ABF), which directly sums up the conservation value across  
191 features [68] and results in a reserve network with high average performance across all features [69].  
192 The ABF algorithm is appropriate for our study since we aim to identify areas representing overall  
193 richness rather than core areas that lead to the equal representation of both common and rare species or  
194 habitats. The algorithm accounts for the total and remaining distributions of features, and optional  
195 feature-weights can be implemented [13]. We equally weighted habitat types and bird species  
196 distributions at the aggregate level to avoid prioritization biases due to the different numbers of  
197 features contained within (e.g., combined weights for 137 bird species or for 36 habitat types summed  
198 to 1). To exclude land uses that for administrative or ecological reasons did not contribute to either  
199 overall conservation value or to the expansion of protected areas (six classes of built-up area), we  
200 applied a cumulative negative weight of -1 to these layers [68].

201

202 Performance curves were produced with the R package 'zonator' [70]. These curves show the  
203 proportion of the original occurrence of features remaining in the landscape as a function of the  
204 proportion of the landscape that is lost [71]. The curves start at 1.0, where the entire distribution of  
205 features is represented in the full landscape, and end at 0.0, where the entire landscape is lost.



206 Because we observed a wide spread in the performance curves of the bird species, we explored  
207 potential underlying patterns related to their broad habitat requirements. We grouped species into their  
208 preferred breeding habitat types (S1 Table) to assess differences between groups and their  
209 performance when the prioritization is accounting for all bird species.

210

211 We also suspected that the range size of feature types, in particular within bird species, influences their  
212 performance in the prioritization. Specifically, we assumed that range restricted species would perform  
213 better, since these species might be retained throughout many prioritization iterations. Yet, this may  
214 only be the case when range-restricted features largely overlap with more widespread features. To  
215 explore this further, we calculated the AUC (area under the curve) of each feature performance curve,  
216 and plotted these as a function of range size (Fig 1). For bird species we calculated range sizes by  
217 summing the Maxent probabilities, and for habitat types we summed the area in km<sup>2</sup>.

218

219 **Figure 1** The Zonation performance of individual features (AUC) as a function of its corresponding  
220 range size. (a) Individuals bird species, belonging to one of the four breeding habitat groups. Green  
221 triangle = forest to (dense) woodland; grey cross = generalist and close to humans; yellow square =  
222 arable land, open woodland to grassland; blue square = wetland and shores. The values for the range  
223 sizes of bird species were computed by adding up Maxent species distribution values. (b) Individual  
224 habitat types

225

## 226 **Surrogacy analyses**

227 We evaluated the reciprocal surrogacy of bird species and habitat types, and assessed the efficacy of  
228 the existing network of protected areas to protect these biodiversity features. To test the surrogacy of  
229 the two feature types, we ran separate analyses using one feature type as the surrogate and the other as  
230 the target. To do so, bird species and habitat types were both included in each run, but positive weights  
231 (=1) were only assigned to the surrogate, while the target was assigned a weight of 0.

232

233 We evaluated the surrogacy power of each feature type using the performance curves. A performance  
234 curve by itself provides, however, little information, and for correct interpretation it should be  
235 compared to an optimal and a random curve [23]. For instance, when testing whether habitat types are  
236 a good surrogate for bird species, the optimal curve is equivalent to the surrogacy of bird species for  
237 themselves. The random curve in this scenario reflects the representation of bird species expected in  
238 the absence of biological data, when ‘area’ is used as a surrogate [72]. Qualitatively the surrogacy  
239 value can be assessed visually by comparing the three curves. The closer the target curve is to the  
240 optimal curve, the higher the surrogacy value. To quantify the surrogacy power, we calculated an  
241 equivalent to the species accumulation index (SAI; Ferrier (73)):

$$242 \quad SAI = (S - R) / (O - R),$$

243 where  $S$  is the area under the target curve,  $R$  is the area under the random curve, and  $O$  is the area  
244 under the optimal curve. The optimal curve was extracted from the runs when targets were used as a  
245 surrogate themselves. To create the random curve, we executed 100 surrogacy runs with randomly,  
246 uniformly distributed data as a surrogate and bird species and habitat types as targets. We used the  
247 mean of the corresponding target curves to calculate SAI.

248

## 249 **Evaluation and potential expansion of the protected area network**

250 To evaluate the representation of habitat and birds in existing reserves, we specifically focussed on  
251 SPAs, national and natural parks, and biosphere reserves. We thus excluded the SCI and SAC areas  
252 (Natura 2000 sites), since they are designed to protect specific species or habitats, but do not  
253 necessarily protect others - or even biodiversity as a whole. To evaluate the effectiveness of the current  
254 network in Romania, we tested 1) how well current PAs represent areas of conservation concern for  
255 bird species and habitat types, and 2) how much of the individual feature type’s distributions are  
256 represented within the current network. Furthermore, we 3) assessed which areas should be prioritized  
257 when expanding the current conservation network.

258

259 The analyses for 1) and 3) were based on a Zonation prioritization outputs, where both bird species  
260 and habitat types had been considered simultaneously. We did not differentiate between protection

261 levels of the existing PAs. If PAs had been selected indiscriminately, we expected that Zonation  
262 values within PAs would be uniformly distributed, as they are across the entire study region. We thus  
263 tested the frequency of Zonation values within PAs against a uniform distribution using a Chi-square  
264 test. For 2) we summarized the distribution of bird species and habitat types within current PAs as a  
265 proportion of their total distribution via boxplots (S1 Fig b and c).

266

267 To identify potential areas that should be prioritized when expanding the current network of PAs, we  
268 performed a mask analysis [74]. In this analysis, current PAs are included as a mask layer, and are  
269 assigned a high rank (=1) in the final prioritization map. As such, the next highly ranked areas outside  
270 protected areas can be identified as potential expansion areas that represent bird and habitat diversity  
271 well.

272

## 273 **Results**

274

### 275 **Spatial conservation prioritization**

276 Both the separate and combined prioritization using bird species and habitat types resulted in broadly  
277 similar patterns, with highly ranked areas in the Carpathian Mountains, river valleys and parts of the  
278 Danube Delta. However smaller-scale differences are apparent, in particular with respect to the size  
279 and clustering of those areas (Fig 2a and S2 Fig).

280

281 **Figure 2** Study region with Zonation ranking based on bird species and habitat type data without (a)  
282 and with (b) considering currently protected areas (mask analysis). Colors indicate importance ranking  
283 scores for conservation, with 0 meaning lowest importance and 1 meaning highest importance. Built-  
284 up areas are indicated in white and were excluded from prioritization. Purple in panel (b) indicates  
285 current protected areas

286

287 The overall performance of bird species for themselves was rather low (AUC=0.65, area under the  
288 bird performance curve) (Fig 3a and S3 Table), but we observed considerable differences between  
289 groups based on breeding habitat (S3 Table).

290

291 **Figure 3** Performance and surrogacy curves quantifying the average proportion of original feature  
292 distributions represented as landscape is lost. Built-up areas were negatively weighted and hence  
293 excluded from the prioritization (lower dashed line). The area between the target curve and the random  
294 curve divided by the area between the optimal curve and random curve represents the efficacy of the  
295 surrogate (SAI; Species accumulation index). In panel (a) bird species were used as a surrogate for  
296 habitat types and in (b) habitats were used as a surrogate for birds

297

298 Wetland and shore-breeders were best retained through the ranking process, followed by those  
299 breeding in “forest to (dense) woodland” areas (Fig 4). In contrast, birds breeding in “arable land, open  
300 woodland to grassland” or being “generalist and close to humans” were lost much more quickly (Fig  
301 4).

302

303 **Figure 4** Performance curves for bird species split by breeding habitats. The solid line is the average  
304 performance curve of all bird species used in the surrogacy approach. Built-up areas were negatively  
305 weighted and hence excluded from the prioritization (lower dashed line)

306

307 To explore this further, we plotted each species’ performance as a function of its range size (Fig 1 and  
308 S1 Table), and found a clear negative trend. “Wetland and shore” breeders include more range-  
309 restricted species compared to other groups and at the same time performed best in the prioritization,  
310 whereas forest, generalist and grassland birds overall have larger ranges, and performed worst in the  
311 prioritization. In addition, the distributions of wetland and shore breeders often overlap with those of  
312 other groups, those resulting in areas of high species richness that are preferentially prioritized by the  
313 ABF algorithm (S3 Fig).

314 Habitat types were generally retained well throughout the prioritization process (AUC=0.9, area under  
315 the habitat surrogate curve) (Fig 3b and S3 Table). We observed that features with smaller ranges were  
316 retained the longest (Fig 1 and S2 Table).

317

## 318 **Surrogacy analyses**

319 Birds were a moderately good surrogate for habitats (SAI = 0.60). Interestingly, birds represented  
320 habitats better than themselves (Fig 3a), although as shown above this is only true for the  
321 representation of all birds combined, and there are large differences between bird groups (Fig 4). The  
322 representation of habitats for birds on the other hand, was less effective (SAI = 0.44; Fig 3b).

323

## 324 **Evaluation of protected areas and identification of expansion**

### 325 **regions**

326 We found that the Zonation values within current PAs, when both habitat types and bird species were  
327 considered, differ significantly from a uniform distribution, with an overrepresentation of higher  
328 values (Chi<sup>2</sup> test, Chi<sup>2</sup> = 29289, df = 9, p-value < 2.2e-16) (S1 Fig a). These results suggest that current  
329 PAs generally comprise areas of high conservation value better than would be expected based on a  
330 random assignment of areas for conservation. However, current PAs also comprise a considerable  
331 amount of land surface area with relatively low conservation values based on bird and habitat  
332 diversity, suggesting that improvements could be made.

333

334 Habitat types are relatively well represented in the current protected areas network (S1 Fig c), with the  
335 exception of grassland, heathland and woodland habitats. Among the breeding groups, generalist and  
336 grassland breeders are on average represented less well than expected under a random assignment,  
337 although in the grassland breeding group much variation between the species can be observed (S1 Fig  
338 b).

339

340 The mask analysis highlighted transition areas from highland to lowland regions, such as along the  
341 northern Carpathian Mountains, the eastern foothills of the Carpathian Mountains, and the eastern part  
342 of the Apuseni Mountains (Fig 2b) as particularly important expansion sites for bird and habitat  
343 conservation.

344

## 345 **Discussion**

346

347 The necessity to rely on surrogates for conservation prioritization raises the question of how effective  
348 they are. Here we evaluated the mutual surrogacy power of bird species and habitat types in Romania,  
349 an area in Europe with high biodiversity, and demonstrated that neither birds nor habitat types are  
350 effective surrogates of one another. Birds represented 60% of habitat conservation priorities, while  
351 habitats were less effective at representing bird conservation priorities (44%). These results are not  
352 only concordant with studies in other regions suggesting to use more than one type of surrogate for  
353 conservation prioritization [13, 32, 42], but also point out that environmental data as conservation  
354 surrogates for species should be carefully evaluated prior to applications of protected area expansions.  
355 We also found that existing protected areas in Romania capture areas of high conservation value for  
356 both biodiversity features better than expected at random, but could potentially be designed more  
357 effectively and more efficiently. Finally, we identified additional areas that should be prioritized in  
358 case the existing network were to be expanded under the European Union Biodiversity Strategy to  
359 2030, or where conservation strategies for conserving avian and habitat diversity on private lands  
360 could be incentivized.

### 361 **Bird species as a surrogate**

362 The effectiveness of 137 breeding bird species as a surrogate for habitats was ~60% of that of habitats  
363 for themselves (Fig 3a). Thus, in the absence of other data, birds could represent habitat types better  
364 than random, but only to a limited extent. These results appear robust because we included many bird  
365 species, breeding in a wide variety of habitats (S1 Table), thus covering the existing habitat diversity

366 quite well. Our results corroborate other studies that found that taxonomic groups are poor surrogates  
367 for one another [for other taxonomic groups, e.g. 13, 14, 25, 26], and should be used cautiously as  
368 surrogates for habitat diversity.

369

370 Interestingly, when prioritizing bird species only (Fig 4) we found that wetland and shore birds were  
371 much better represented than forest, grassland, and generalist species. This unexpected result  
372 corroborates the focal areas of the Bird Directive, which demands particular attention to wetland  
373 species [75, Art 4 (2)]. A potential explanation for this representation bias is the emphasis of the  
374 additive-benefit function (ABF) on high average performance across all features - in the case of bird  
375 species, areas with high species richness [69] – combined with differences in range sizes between the  
376 bird groups [14, 67]. We found that species richness was highest in areas where the distributions of  
377 wetland-breeding species overlapped with those of species breeding in other types of habitat (S3 Fig).  
378 Because wetland birds generally have small ranges due to the limited availability of suitable habitat  
379 [76], Zonation prioritized the species-rich wetlands over areas with fewer species, where more widely  
380 distributed species occur (Fig 1). These results are in line with similar patterns in small versus large-  
381 range moths [20], butterflies, reptiles, and amphibians [14]. The representation bias in our study may  
382 be exacerbated by associations of generalist species to human-dominated landscapes. Because we  
383 negatively weighted and hence excluded built-up areas from the prioritization, species occurring in  
384 those areas may be underrepresented in the final results.

385

## 386 **Habitats as a surrogate**

387 Habitats as a surrogate for birds were only 44 % as effective as the maximum possible. This result is  
388 consistent with other studies showing that environmental diversity may have limited suitability as a  
389 proxy for the diversity of small vertebrates (including bird species) [32, 77]. Yet, habitats represented  
390 birds better than random (Fig 3b), potentially due to the influence of habitat structure on bird species  
391 occurrence and distributions [43]. It remains unclear whether higher spatial and thematic resolutions –  
392 in particular more detailed habitat classifications – could improve the mutual representation.

393

394 The underlying concept of using environmental diversity (ED) as a conservation surrogate is that by  
395 selecting areas that cover a wide range of environmental conditions, other levels of biodiversity should  
396 be covered equally well [35]. The surrogacy power of ED may, however, depend on how it is tested  
397 and implemented in prioritization schemes, and whether it covers multiple taxonomic groups. Some  
398 studies suggested that pre-classified environmental data such as the ETE dataset [58] perform equally  
399 well or better than continuous environmental variables as a surrogate for species diversity [e.g. 15, 32,  
400 37, 42, 78]. However, inconsistencies in the application of ED as a conservation surrogate and in what  
401 form it should be implemented (e.g. as discrete classes or continuous variation), are still unresolved,  
402 and also likely depend on the types of species data available. For instance, implementing ED as a  
403 distance matrix across as many environmental variables as possible, in combination with a different  
404 optimization procedure may in some cases help improve its surrogacy power [e.g. 36]. Yet, continuous  
405 environmental data such as climate or vegetation characteristics such as density or cover may fail to  
406 capture potentially important attributes summarized in classified habitat data like the ETE. To this end,  
407 more empirical evidence is needed from direct comparisons between methods as well as the  
408 performance of different measures of ED to provide a solid basis for recommendations of best  
409 practice.

410

411 Given the still existing uncertainties surrounding the use of ED, we set out with pre-classified habitat  
412 types, which are themselves based on a wide range of climatic and environmental conditions [58].  
413 Within the methodological and geographical scope of our study, results suggest that habitat classes  
414 performed relatively poorly at representing bird biodiversity in Romania, and ideally should not be  
415 used on their own in prioritization efforts. Instead, combining taxonomic and environmental surrogates  
416 could increase the surrogacy power for the protection of overall biodiversity [13, 42], but a single  
417 taxonomic group may not suffice. For instance, habitats and birds did not perform well in representing  
418 amphibians and reptiles in other areas [15, 38, 43]. Thus, we recommend to combine environmental  
419 and taxonomic surrogates, preferentially from multiple taxonomic groups.

420



## 421 **Representation in existing protected areas and conservation**

### 422 **implications**

423

424 We found that a considerable fraction of PAs is located in areas with high conservation values. It is  
425 important to stress, however, that our evaluations by no means suggest that the current network of PAs  
426 is sufficient. Around 23% of Romania's land surface area is currently under protection, and  
427 improvements to the protected area network may be necessary [48, 49]. Large ecoregions and several  
428 widespread bird and mammal species may be protected sufficiently well, but smaller ecoregions, as  
429 well as invertebrate and plant species are for example underrepresented in the existing Natura 2000  
430 network [49]. The current network of PAs consists of reserves designed for various purposes. In our  
431 evaluation, we specifically focused on those that have been designed to protect birds, habitats, or  
432 biodiversity as a whole, i.e. SPAs, national and natural parks, and biosphere reserves. We found that  
433 these PAs represent areas of high bird or habitat conservation value better than a random assignment  
434 of areas for protection. However, habitats were better represented than birds (S1 Fig b and c). We also  
435 found that rare habitats are well represented, which is consistent with results for the Czech Republic  
436 [54]. These habitats typically are wetlands and shores, large areas of which are protected in the  
437 Danube Delta. Surprisingly, the representation of grassland and woodland habitats was rather poor. A  
438 likely reason for this result is the large area of wood- and grassland habitats in Romania, only part of  
439 which can be represented in PAs (S4 Fig). In contrast, rare habitats such as littoral areas are  
440 represented at high percentages, because they can be entirely contained within a fraction of the total  
441 land surface area. Despite the fact that current PAs capture important areas for conservation relatively  
442 well, a tail of areas with low conservation value can also be observed (S1 Fig). It remains unclear  
443 whether these areas may be important for other reasons, such as for other taxonomic groups, or as  
444 corridors between areas of high conservation value. Yet, the presence of areas with low conservation  
445 value also suggests that improvements in both the efficiency and efficacy of the network may be  
446 possible. To this end, we identified areas that should be prioritized based on bird and habitat diversity  
447 in a scenario of future expansions of the current network. A recent study suggests that such

448 improvements may best be developed at the level of Biogeographical Regions rather than at the  
449 national level [57].

450

451 Protected areas are a crucial component of conservation, but the identification and designation of PAs  
452 is often a lengthy and difficult process. In addition, even when the new targets for the EU Biodiversity  
453 Strategy are met, 70% of the land surface area will remain unprotected. Hence, effective conservation  
454 also depends on the protection of biodiversity outside of PAs. To do so, the development of incentives  
455 for targeted management practices to retain high diversity of species and habitats should be prioritized  
456 [79], yet scientific research that can support management decision is largely lacking [80].

457

458 We conducted this study in Romania, a heterogeneous and species-rich country, comprising five  
459 biogeographical regions. We exploited an extensive data set on breeding bird species that has only  
460 recently become available for the country. Our study adds to the body of evidence that taxonomic and  
461 environmental surrogates represent one another only to a limited extent. Hence, the use of just one  
462 type of surrogate may not capture the broad patterns of biodiversity sufficiently well. This situation is  
463 less than ideal, as conservation measures respond to the biodiversity crisis, with little time to collect  
464 data on the distribution of species or habitats. Although these data are becoming increasingly  
465 available, our results highlight the need for investing in survey and monitoring schemes in countries  
466 such as Romania, where data still remains relatively scarce. Our study also presents an example of the  
467 importance of scientific research in informing conservation strategies as a stakeholder, which often  
468 remains underrated [52, 53].

469

470

471

472

473

## 474 **References**

475

- 476 1. Pressey R. Conservation planning and biodiversity: assembling the best data for the job.  
477 Conservation biology. 2004;18(6):1677-81.
- 478 2. Bottrill MC, Joseph LN, Carwardine J, Bode M, Cook C, Game ET, Grantham H, Kark S, Linke S,  
479 McDonald-Madden E. Is conservation triage just smart decision making? Trends in ecology &  
480 evolution. 2008;23(12):649-54.
- 481 3. Joseph LN, Maloney RF, Possingham HP. Optimal allocation of resources among threatened  
482 species: a project prioritization protocol. Conservation biology. 2009;23(2):328-38.
- 483 4. Margules CR, Pressey RL. Systematic conservation planning. Nature. 2000;405(6783):243.
- 484 5. Noss RF. Indicators for monitoring biodiversity: a hierarchical approach. Conservation  
485 biology. 1990;4(4):355-64.
- 486 6. Andelman SJ, Fagan WF. Umbrellas and flagships: efficient conservation surrogates or  
487 expensive mistakes? Proceedings of the National Academy of Sciences. 2000;97(11):5954-9.
- 488 7. Sarkar S, Justus J, Fuller T, Kelley C, Garson J, Mayfield M. Effectiveness of environmental  
489 surrogates for the selection of conservation area networks. Conservation Biology. 2005;19(3):815-25.
- 490 8. Hunter M, Westgate M, Barton P, Calhoun A, Pierson J, Tulloch A, Beger M, Branquinho C,  
491 Caro T, Gross J, Heino J, Lane P, Longo C, Martin K, McDowell WH, Mellin C, Salo H, Lindenmayer D.  
492 Two roles for ecological surrogacy: Indicator surrogates and management surrogates. Ecological  
493 Indicators. 2016;63:121-5.
- 494 9. Sauberer N, Zulka KP, Abensperg-Traun M, Berg H-M, Bieringer G, Milasowszky N, Moser D,  
495 Plutzer C, Pollheimer M, Storch C, Tröstl R, Zechmeister H, Grabherr G. Surrogate taxa for biodiversity  
496 in agricultural landscapes of eastern Austria. Biological Conservation. 2004;117(2):181-90.
- 497 10. Oliver I, Holmes A, Dangerfield JM, Gillings M, Pik AJ, Britton DR, Holley M, Montgomery ME,  
498 Raison M, Logan V. Land systems as surrogates for biodiversity in conservation planning. Ecological  
499 Applications. 2004;14(2):485-503.
- 500 11. Gaston KJ, Jackson SF, Nagy A, Cantú-Salazar L, Johnson M. Protected areas in Europe:  
501 principle and practice. Annals of the New York Academy of Sciences. 2008;1134(1):97-119.
- 502 12. Araújo MB, Lobo JM, Moreno JC. The effectiveness of Iberian protected areas in conserving  
503 terrestrial biodiversity. Conservation Biology. 2007;21(6):1423-32.
- 504 13. Di Minin E, Moilanen A. Improving the surrogacy effectiveness of charismatic megafauna  
505 with well-surveyed taxonomic groups and habitat types. Journal of Applied Ecology. 2014;51(2):281-  
506 8.
- 507 14. Franco AM, Anderson BJ, Roy DB, Gillings S, Fox R, Moilanen A, Thomas CD. Surrogacy and  
508 persistence in reserve selection: landscape prioritization for multiple taxa in Britain. Journal of  
509 Applied Ecology. 2009;46(1):82-91.
- 510 15. Grantham HS, Pressey RL, Wells JA, Beattie AJ. Effectiveness of biodiversity surrogates for  
511 conservation planning: different measures of effectiveness generate a kaleidoscope of variation.  
512 PLoS One. 2010;5(7).
- 513 16. Caro T, O'Doherty G. On the use of surrogate species in conservation biology. Conservation  
514 biology. 1999;13(4):805-14.
- 515 17. Wiens JA, Hayward GD, Holthausen RS, Wisdom MJ. Using surrogate species and groups for  
516 conservation planning and management. BioScience. 2008;58(3):241-52.
- 517 18. Sibarani MC, Di Marco M, Rondinini C, Kark S, Toit Jd. Measuring the surrogacy potential of  
518 charismatic megafauna species across taxonomic, phylogenetic and functional diversity on a  
519 megadiverse island. Journal of Applied Ecology. 2019;56(5):1220-31.
- 520 19. Lawler JJ, White D, Sifneos JC, Master LL. Rare species and the use of indicator groups for  
521 conservation planning. Conservation biology. 2003;17(3):875-82.

- 522 20. Lund MP, Rahbek C, editors. Cross-taxon congruence in complementarity and conservation of  
523 temperate biodiversity. *Animal Conservation forum*; 2002: Cambridge University Press.
- 524 21. Rozyłowicz L, Popescu VD, Pătroescu M, Chișamera G. The potential of large carnivores as  
525 conservation surrogates in the Romanian Carpathians. *Biodiversity and Conservation*.  
526 2011;20(3):561-79.
- 527 22. Moritz C, Richardson KS, Ferrier S, Monteith GB, Stanisić J, Williams SE, Whiffin T.  
528 Biogeographical concordance and efficiency of taxon indicators for establishing conservation priority  
529 in a tropical rainforest biota. *Proceedings of the Royal Society of London Series B: Biological Sciences*.  
530 2001;268(1479):1875-81.
- 531 23. Rodrigues AS, Brooks TM. Shortcuts for biodiversity conservation planning: the effectiveness  
532 of surrogates. *Annu Rev Ecol Evol Syst*. 2007;38:713-37.
- 533 24. Bertrand Y, Pleijel F, Rouse GW. Taxonomic surrogacy in biodiversity assessments, and the  
534 meaning of Linnaean ranks. *Systematics and Biodiversity*. 2006;4(2):149-59.
- 535 25. Billeter R, Liira J, Bailey D, Bugter R, Arens P, Augenstein I, Aviron S, Baudry J, Bukacek R,  
536 Burel F. Indicators for biodiversity in agricultural landscapes: a pan-European study. *Journal of*  
537 *Applied ecology*. 2008;45(1):141-50.
- 538 26. Larsen FW, Bladt J, Balmford A, Rahbek C. Birds as biodiversity surrogates: will supplementing  
539 birds with other taxa improve effectiveness? *Journal of Applied Ecology*. 2012;49(2):349-56.
- 540 27. Veríssimo D, Fraser I, Groombridge J, Bristol R, MacMillan DC. Birds as tourism flagship  
541 species: a case study of tropical islands. *Animal Conservation*. 2009;12(6):549-58.
- 542 28. Garson J, Aggarwal A, Sarkar S. Birds as surrogates for biodiversity: an analysis of a data set  
543 from southern Quebec. *Journal of Biosciences*. 2002;27(4):347-60.
- 544 29. Juutinen A, Mönkkönen M. Testing alternative indicators for biodiversity conservation in old-  
545 growth boreal forests: ecology and economics. *Ecological Economics*. 2004;50(1-2):35-48.
- 546 30. Moore JL, Balmford A, Brooks T, Burgess ND, Hansen LA, Rahbek C, Williams PH. Performance  
547 of sub-Saharan vertebrates as indicator groups for identifying priority areas for conservation.  
548 *Conservation Biology*. 2003;17(1):207-18.
- 549 31. Williams P, Faith D, Manne L, Sechrest W, Preston C. Complementarity analysis: Mapping the  
550 performance of surrogates for biodiversity. *Biological Conservation*. 2006;128(2):253-64.
- 551 32. Bonn A, Gaston KJ. Capturing biodiversity: selecting priority areas for conservation using  
552 different criteria. *Biodiversity & Conservation*. 2005;14(5):1083-100.
- 553 33. Arponen A, Moilanen A, Ferrier S. A successful community-level strategy for conservation  
554 prioritization. *Journal of Applied Ecology*. 2008;45(5):1436-45.
- 555 34. Beier P, Sutcliffe P, Hjort J, Faith DP, Pressey RL, Albuquerque F. A review of selection-based  
556 tests of abiotic surrogates for species representation. *Conservation Biology*. 2015;29(3):668-79.
- 557 35. Faith DP, Walker P. Environmental diversity: on the best-possible use of surrogate data for  
558 assessing the relative biodiversity of sets of areas. *Biodiversity & Conservation*. 1996;5(4):399-415.
- 559 36. Engelbrecht I, Robertson M, Stoltz M, Joubert JW. Reconsidering environmental diversity (ED)  
560 as a biodiversity surrogacy strategy. *Biol Conserv*. 2016;197:171-9.
- 561 37. Hortal J, Araújo MB, Lobo JM. Testing the effectiveness of discrete and continuous  
562 environmental diversity as a surrogate for species diversity. 2009;9(1):138-49.
- 563 38. Araújo M, Humphries C, Densham P, Lampinen R, Hagemeyer W, Mitchell-Jones A, Gasc J.  
564 Would environmental diversity be a good surrogate for species diversity? *Ecography*. 2001;24(1):103-  
565 10.
- 566 39. Faith DP, Ferrier S, Walker P. The ED strategy: how species-level surrogates indicate general  
567 biodiversity patterns through an 'environmental diversity' perspective. *Journal of biogeography*.  
568 2004;31(8):1207-17.
- 569 40. Faith DP. Attempted tests of the surrogacy value of the ED environmental diversity measures  
570 highlight the need for corroboration assessment of surrogacy hypotheses. *Ecological Indicators*.  
571 2011;11(2):745-8.
- 572 41. Carmel Y, Stoller-Cavari L. Comparing environmental and biological surrogates for  
573 biodiversity at a local scale. *Israel Journal of Ecology and Evolution*. 2006;52(1):11-27.

- 574 42. Lombard AT, Cowling RM, Pressey RL, Rebelo AG. Effectiveness of land classes as surrogates  
575 for species in conservation planning for the Cape Floristic Region. *Biological Conservation*.  
576 2003;112(1-2):45-62.
- 577 43. Mac Nally R, Bennett AF, Brown GW, Lumsden LF, Yen A, Hinkley S, Lillywhite P, Ward D. How  
578 well do ecosystem-based planning units represent different components of biodiversity? *Ecological*  
579 *applications*. 2002;12(3):900-12.
- 580 44. Hess GR, Bartel RA, Leidner AK, Rosenfeld KM, Rubino MJ, Snider SB, Ricketts TH.  
581 Effectiveness of biodiversity indicators varies with extent, grain, and region. *Biological Conservation*.  
582 2006;132(4):448-57.
- 583 45. Reyers B, Wessels K, Van Jaarsveld A. An assessment of biodiversity surrogacy options in the  
584 Limpopo Province of South Africa. *African Zoology*. 2002;37(2):185-95.
- 585 46. Schmitt T, Rákosy L. Changes of traditional agrarian landscapes and their conservation  
586 implications: a case study of butterflies in Romania. *Diversity and distributions*. 2007;13(6):855-62.
- 587 47. Ioras F. Trends in Romanian biodiversity conservation policy. *Biodiversity & Conservation*.  
588 2003;12(1):9-23.
- 589 48. Niculae MI, Avram S, Vânău GO, Pătroescu M. Effectiveness of Natura 2000 network in  
590 Romanian Alpine Biogeographical Region: an assessment based on forest landscape connectivity.  
591 *Annals of Forest Research*. 2017;60(1):19-32.
- 592 49. Iojă CI, Pătroescu M, Rozyłowicz L, Popescu VD, Vergheteș M, Zotta MI, Felciuc M. The  
593 efficacy of Romania's protected areas network in conserving biodiversity. *Biological Conservation*.  
594 2010;143(11):2468-76.
- 595 50. Popescu VD, Rozyłowicz L, Cogălniceanu D, Niculae IM, Cucu AL. Moving into protected  
596 areas? Setting conservation priorities for Romanian reptiles and amphibians at risk from climate  
597 change. *PloS one*. 2013;8(11):e79330.
- 598 51. Miu IV, Chisamera GB, Popescu VD, Iosif R, Nita A, Manolache S, Gavril VD, Cobzaru I,  
599 Rozyłowicz L. Conservation priorities for terrestrial mammals in Dobrogea Region, Romania. *ZooKeys*.  
600 2018(792):133.
- 601 52. Opermanis O, MacSharry B, Bailly-Maitre J, Evans D, Sipkova Z. The role of published  
602 information in reviewing conservation objectives for Natura 2000 protected areas in the European  
603 Union. *Environmental management*. 2014;53(3):702-12.
- 604 53. Popescu VD, Rozyłowicz L, Niculae IM, Cucu AL, Hartel T. Species, habitats, society: an  
605 evaluation of research supporting EU's Natura 2000 network. *PloS one*. 2014;9(11):e113648.
- 606 54. Pechanec V, Machar I, Pohanka T, Opršal Z, Petrovič F, Švajda J, Šálek L, Chobot K, Filippovová  
607 J, Cudlín P. Effectiveness of Natura 2000 system for habitat types protection: A case study from the  
608 Czech Republic. *Nature Conservation*. 2018;24:21.
- 609 55. D'Amen M, Bombi P, Campanaro A, Zapponi L, Bologna M, Mason F. Protected areas and  
610 insect conservation: questioning the effectiveness of Natura 2000 network for saproxylic beetles in I  
611 taly. *Animal Conservation*. 2013;16(4):370-8.
- 612 56. European Commission. EU Biodiversity Strategy for 2030. Bringing nature back into our lives.  
613 Communication from the Commission to the European Parliament, the Council, the European  
614 Economic and Social Committee and the Committee of the Regions. 2020.
- 615 57. Miu IV, Rozyłowicz L, Popescu VD, Anastasiu P. Identification of areas of very high biodiversity  
616 value to achieve the EU Biodiversity Strategy for 2030 key commitments. *bioRxiv*. 2020.
- 617 58. European Environment Agency. Mapping and Assessing the Condition of Europe's  
618 Ecosystems: Progress and Challenges. 2019.
- 619 59. European Commission. Natura 2000 barometer. *Nature Newsletter*. 2007;23:11-2.
- 620 60. Fântână C, Kovács I. The Romanian breeding bird atlas 2006-2017, a common scheme of  
621 Milvus Group Association and the Romanian Ornithological Society. in preparation. 2020.
- 622 61. Yang W, Ma K, Kreft HJJoB. Geographical sampling bias in a large distributional database and  
623 its effects on species richness–environment models. 2013;40(8):1415-26.
- 624 62. Phillips S, Dudík M, Schapire R. Maxent software for modeling species niches and  
625 distributions v. 3.4. 1. URL: [http://biodiversityinformatics](http://biodiversityinformatics.amnh.org/open_source/maxent) amnh org/open\_source/maxent. 2017.



- 626 63. Weiss M, Banko G. Ecosystem Type Map v3. 1–Terrestrial and Marine Ecosystems. European  
627 Environment Agency (EEA)—European Topic Centre on Biological Diversity. 2018:79.
- 628 64. Moilanen A, Kujala H. Zonation: Spatial conservation planning framework and software v. 1.0  
629 [user manual]. 2006.
- 630 65. Kremen C, Cameron A, Moilanen A, Phillips S, Thomas C, Beentje H, Dransfield J, Fisher B,  
631 Glaw F, Good T. Aligning conservation priorities across taxa in Madagascar with high-resolution  
632 planning tools. *Science*. 2008;320(5873):222-6.
- 633 66. Di Minin E, Moilanen A. Empirical evidence for reduced protection levels across biodiversity  
634 features from target-based conservation planning. *Biological Conservation*. 2012;153:187-91.
- 635 67. Moilanen A, Franco AM, Early RI, Fox R, Wintle B, Thomas CD. Prioritizing multiple-use  
636 landscapes for conservation: methods for large multi-species planning problems. *Proceedings of the*  
637 *Royal Society B: Biological Sciences*. 2005;272(1575):1885-91.
- 638 68. Moilanen A, Anderson BJ, Eigenbrod F, Heinemeyer A, Roy DB, Gillings S, Armsworth PR,  
639 Gaston KJ, Thomas CD. Balancing alternative land uses in conservation prioritization. *Ecological*  
640 *Applications*. 2011;21(5):1419-26.
- 641 69. Arponen A, Heikkinen RK, Thomas CD, Moilanen A. The value of biodiversity in reserve  
642 selection: representation, species weighting, and benefit functions. *Conservation Biology*.  
643 2005;19(6):2009-14.
- 644 70. Lehtomäki J. "zonator R package.". 2016-2018;R package version 0.6.0.
- 645 71. Lehtomäki J, Moilanen A. Methods and workflow for spatial conservation prioritization using  
646 Zonation. *Environmental Modelling & Software*. 2013;47:128-37.
- 647 72. Rosenzweig ML. *Species diversity in space and time*: Cambridge University Press; 1995.
- 648 73. Ferrier S. Mapping spatial pattern in biodiversity for regional conservation planning: where to  
649 from here? *Systematic biology*. 2002;51(2):331-63.
- 650 74. Moilanen A, Pouzols F, Meller L, Veach V, Arponen A, Leppänen J, Kujala H. Zonation—Spatial  
651 Conservation Planning Methods and Software. Version 4. User Manual. University of Helsinki:  
652 Finland. 2014.
- 653 75. European Commission. Directive 2009/147/EC of the European Parliament and of the  
654 Council of 30 November 2009 on the conservation of wildbirds. 2009.
- 655 76. Tozer DC, Nol E, Abraham KF. Effects of local and landscape-scale habitat variables on  
656 abundance and reproductive success of wetland birds. *Wetlands Ecology and Management*.  
657 2010;18(6):679-93.
- 658 77. Popescu VD, Munshaw RG, Shackelford N, Pouzols FM, Dubman E, Gibeau P, Horne M,  
659 Moilanen A, Palen WJ. Quantifying biodiversity trade-offs in the face of widespread renewable and  
660 unconventional energy development. *Scientific reports*. 2020;10(1):1-12.
- 661 78. Trakhtenbrot A, Kadmon RJC. Effectiveness of environmental cluster analysis in  
662 representing regional species diversity. 2006;20(4):1087-98.
- 663 79. Manolache S, Nita A, Hartel T, Miu IV, Ciocanea CM, Rozyłowicz L. Governance networks  
664 around grasslands with contrasting management history. *bioRxiv*. 2020.
- 665 80. Nita A, Hartel T, Manolache S, Ciocanea CM, Miu IV, Rozyłowicz L. Who is researching  
666 biodiversity hotspots in Eastern Europe? A case study on the grasslands in Romania. *Plos one*.  
667 2019;14(5):e0217638.

668

669

## 670 **Supporting information - Figures captions**

671 **S1 Figure** (a) Barplot of conservation values of areas in current reserves. The horizontal dashed line  
672 indicates the expected frequency of each conservation value (freq = 3338.6), had the current PAs be  
673 selected at random. The high frequencies of high conservation values, combined with the low  
674 frequencies of low conservation values suggest that current PAs were selected efficiently. (b-c) Box-  
675 and-whisker plots for birds (b) and habitats (c) showing the proportion of the total distribution of each  
676 group of feature types that is represented in the existing protected area network. A dotted line indicates  
677 the random expectation for the representation of each feature class based on the amount of protected  
678 area in Romania (~ 23% of land surface area)

679

680 **S2 Figure** Study region with Zonation ranking based on (a) Bird species and (b) habitat types. Colors  
681 indicate importance ranking scores for conservation, with 0 meaning lowest importance and 1 meaning  
682 highest importance. Built-up areas are indicated in white and were excluded from prioritization

683

684 **S3 Figure** Overlapping bird species occurrences per breeding habitat group: (a) forests to (dense)  
685 woodland, (b) generalist and close to humans, (c) arable land, open woodland to grasslands, and (d)  
686 wetlands and shores. Red indicates species-rich areas; white to grey indicate no or low overlap of  
687 species occurrences

688

689 **S4 Figure** Study region with (a) forest habitats and (b) grassland habitats highlighted. The used  
690 protected area network is highlighted in grey

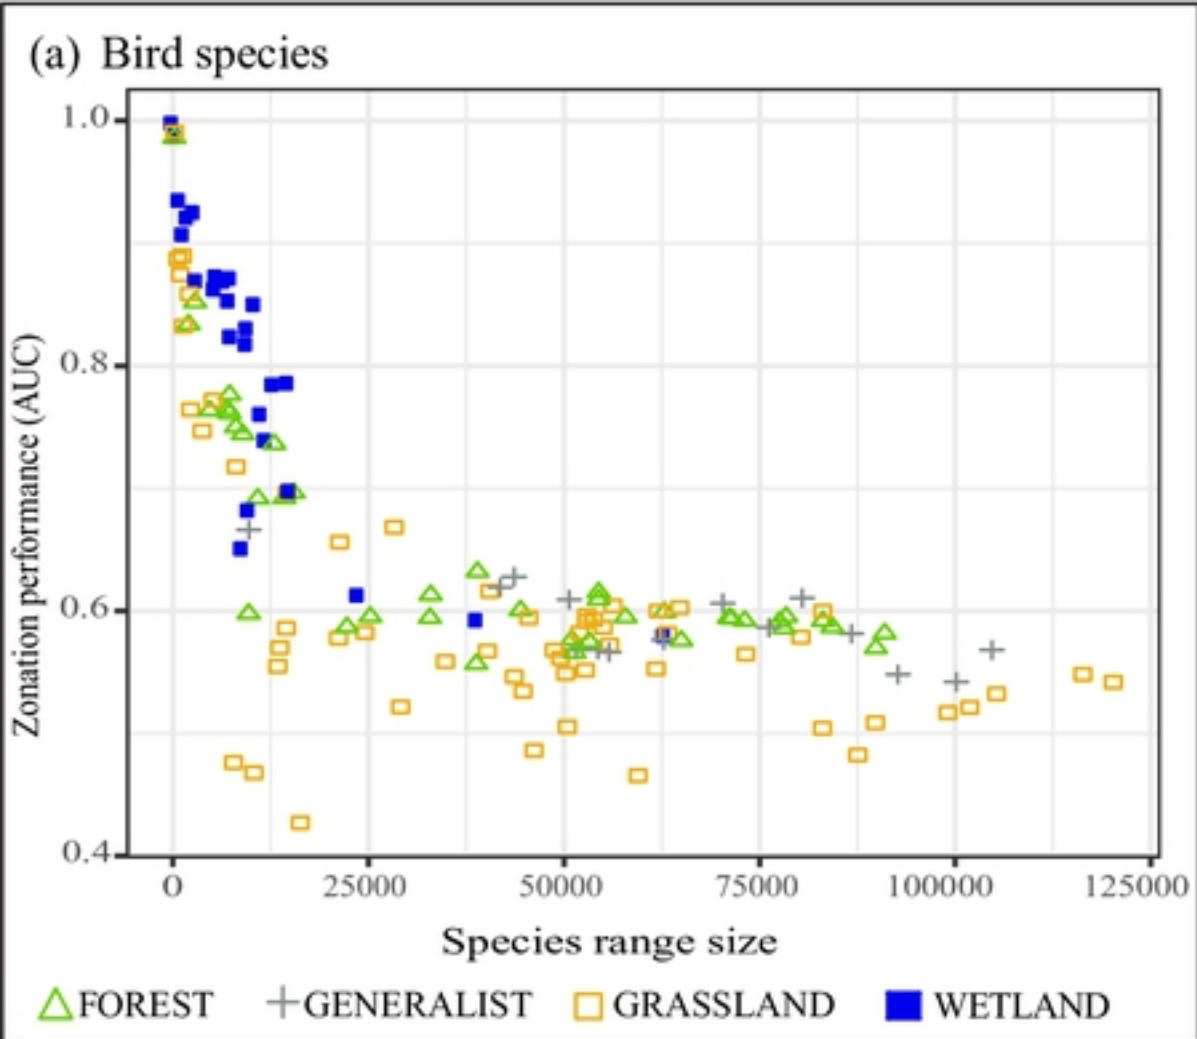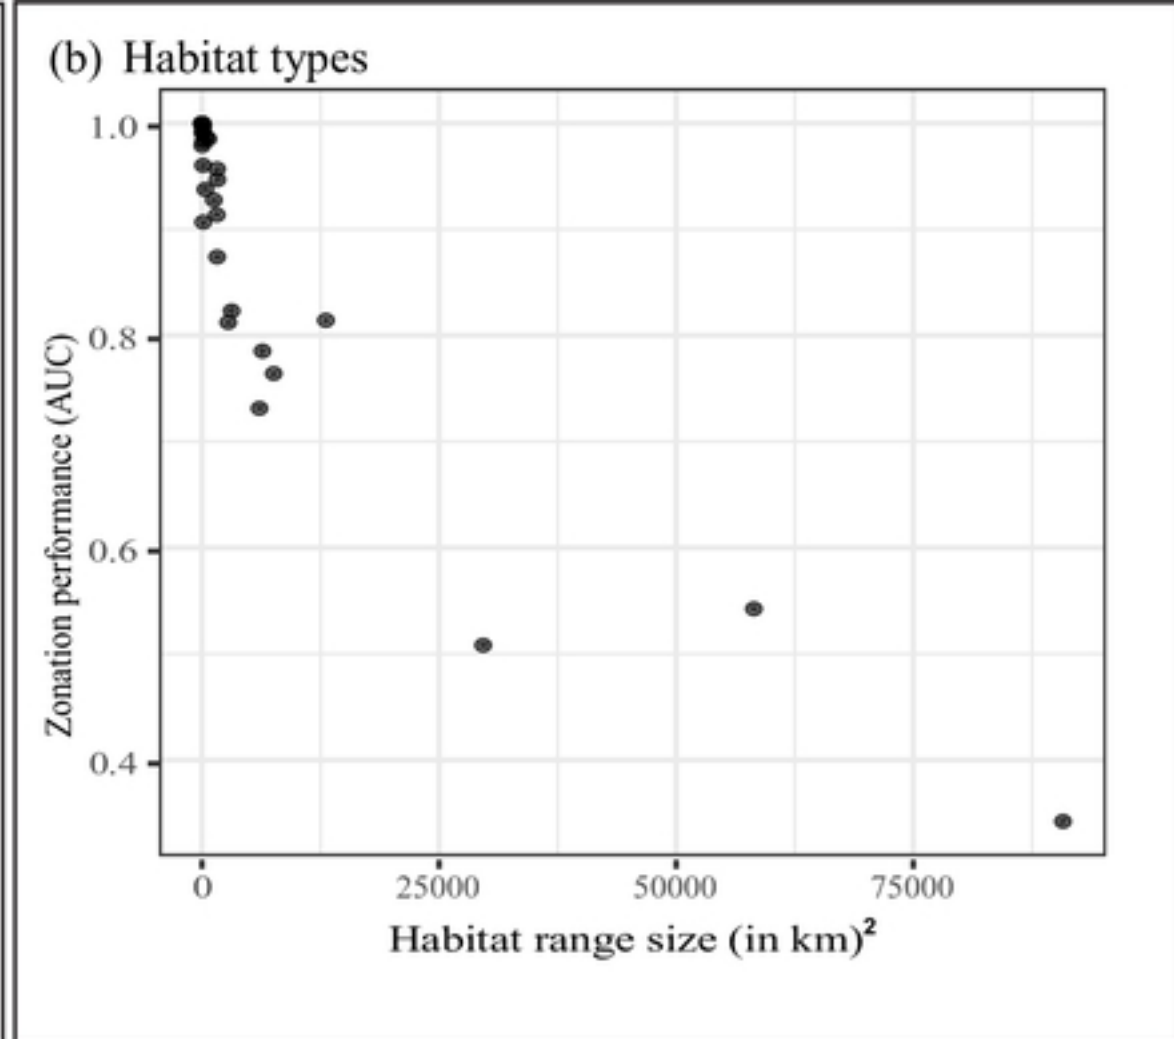

Figure 1



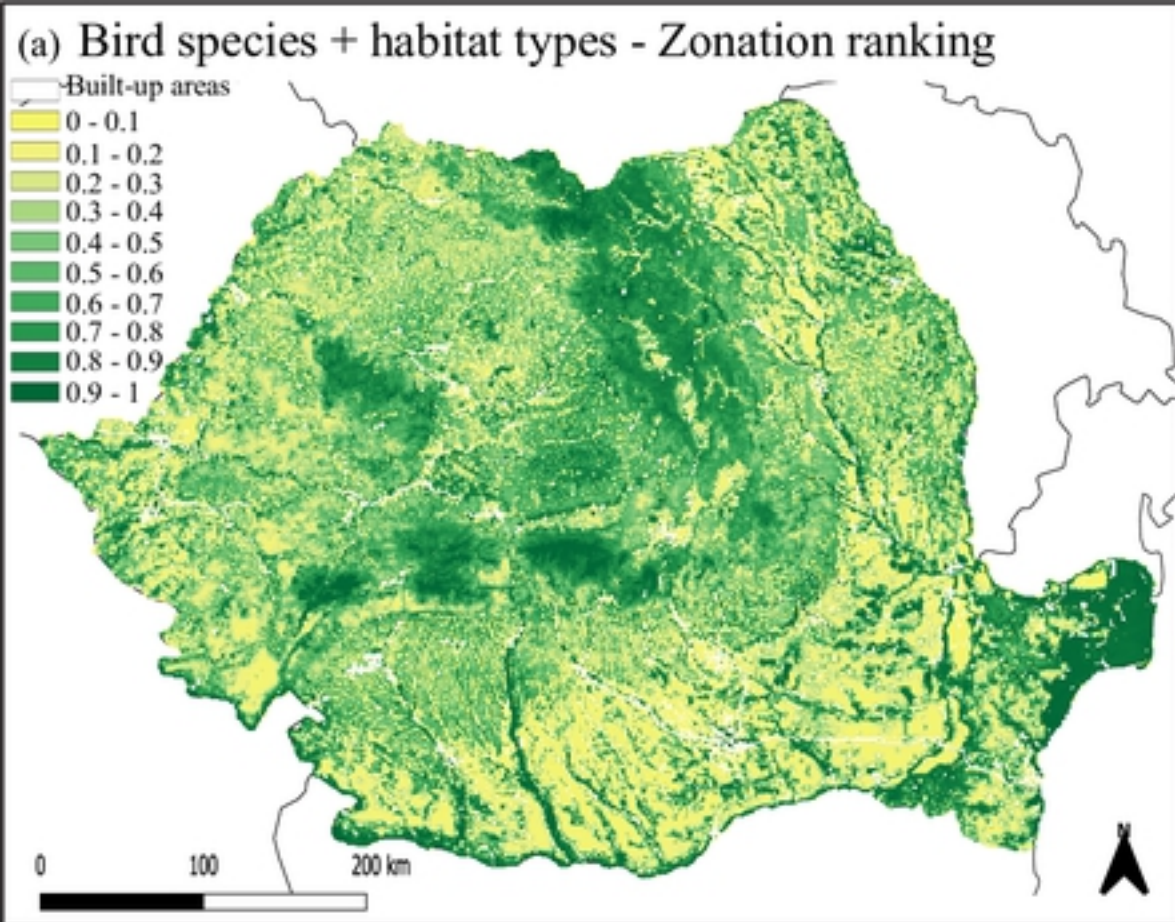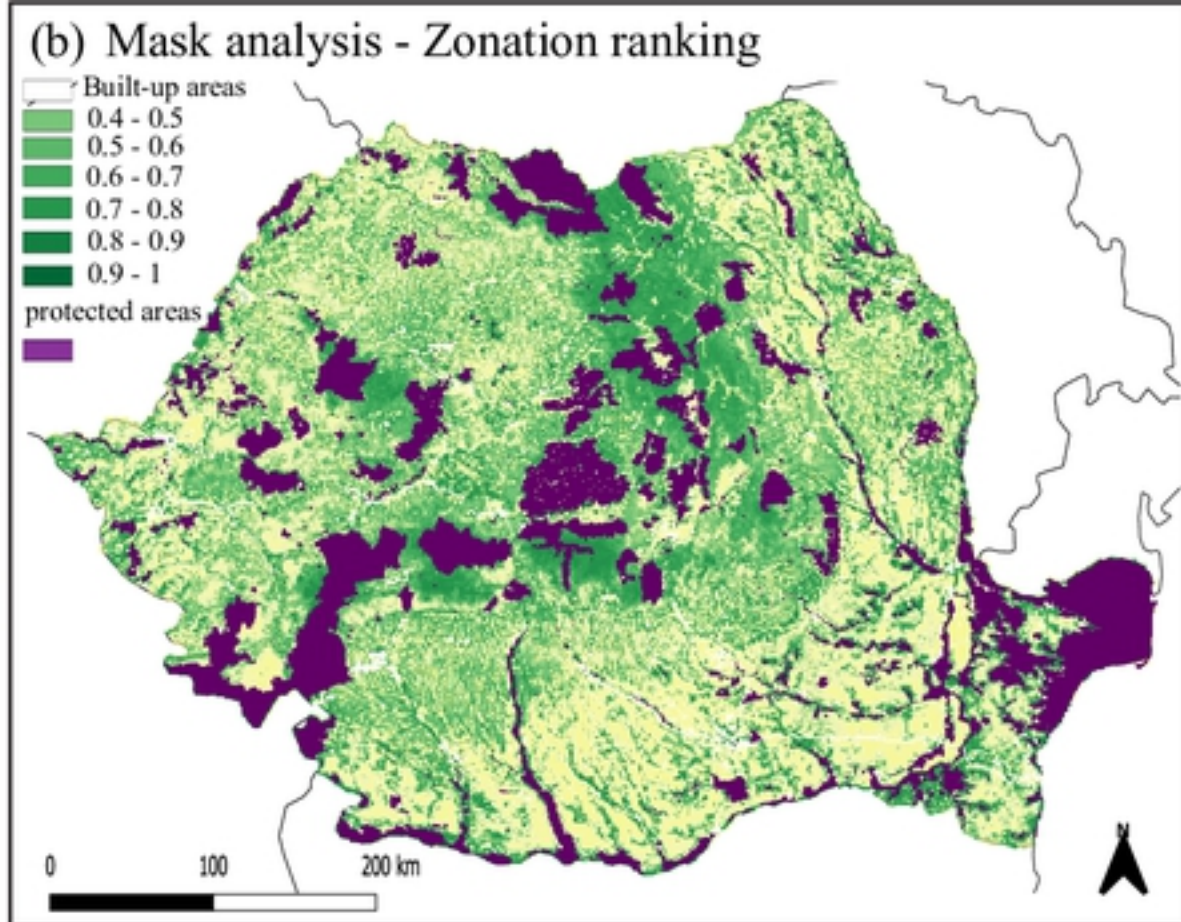

Figure 2

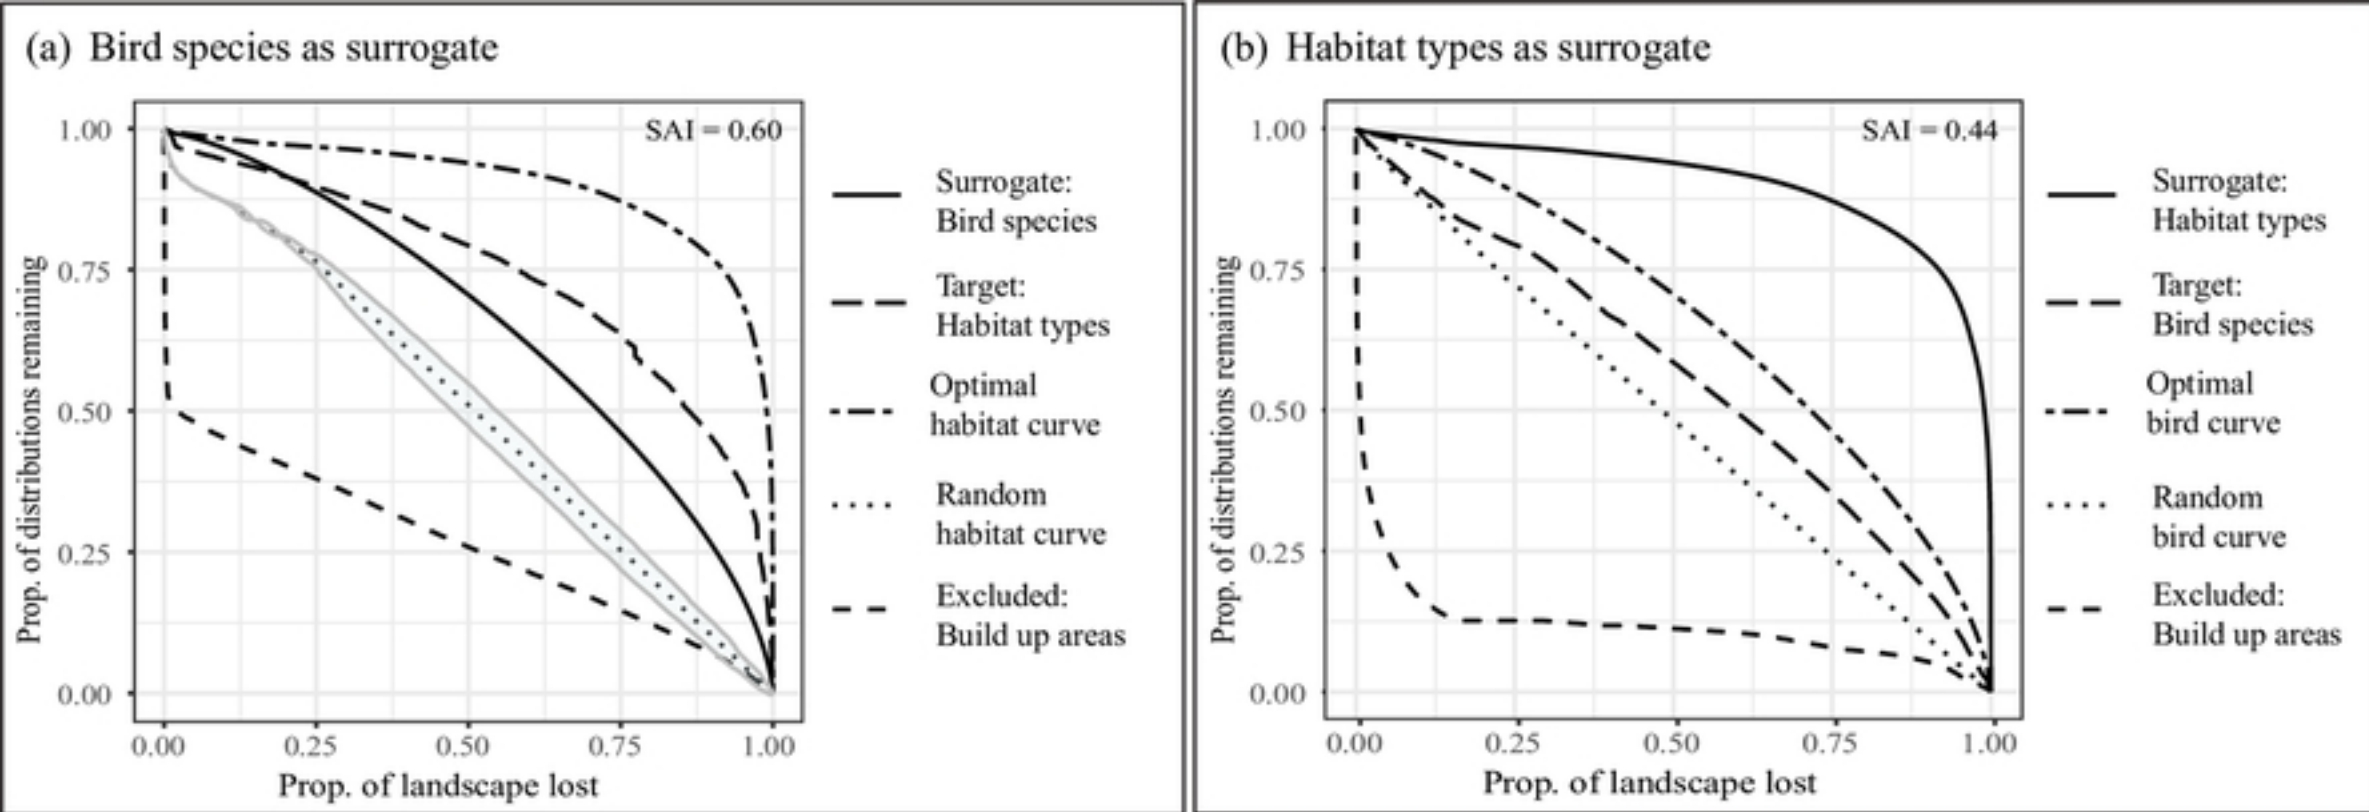

Figure 3

# Bird species groups

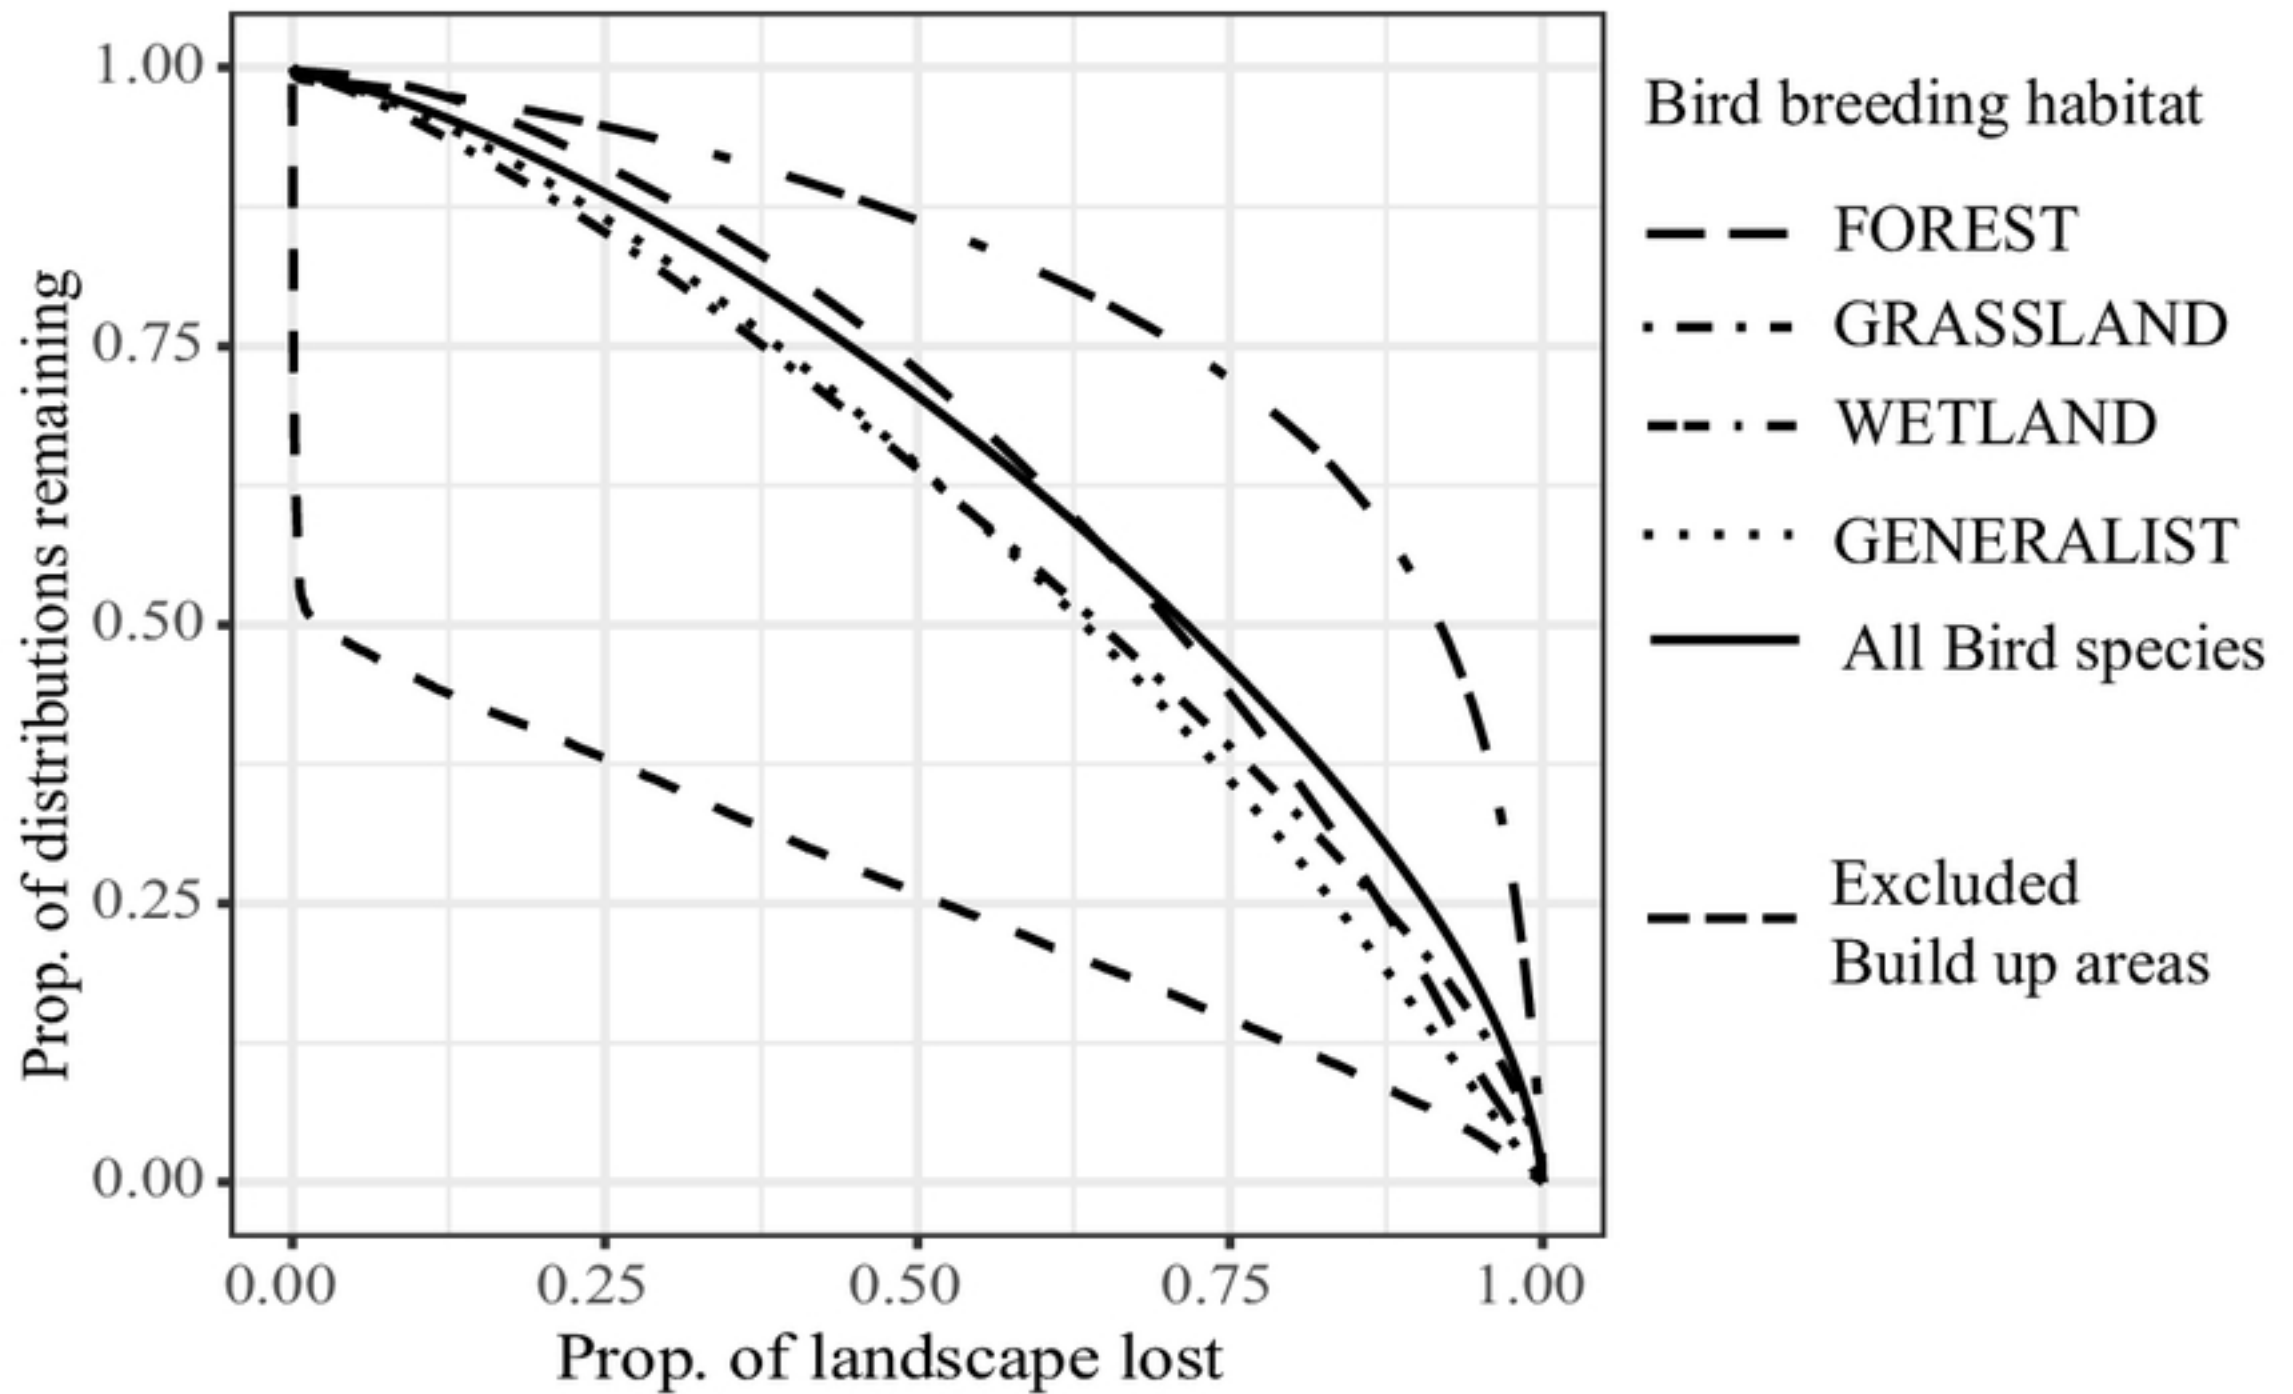

Figure 4
